# Supplementary material for: The normoglycaemic biobreeding rat: a spontaneous model for impaired gastric accommodation
Source: HighWire-hosted journal article supplement (doi:10.1136/gutjnl-2014-308154), 2014-11-19
Supplement: gutjnl-2014-308154supp.pdf [file gutjnl-2014-308154supp.pdf]

**Supplementary 1.** Comparison of muscle strip relaxation between striped (neuromuscular tissue) and unstriped (neuromuscular and mucosa) fundic muscle tissue. Fundic tissue was removed an partially stripped. Both the stripped and unstriped parts were mounted in the organ bath and relaxation was compared. This was done under both NANC conditions (top figure) and in presence of L-NAME (bottom figure). Experiments were done in control animals of 200 days old and N=3.

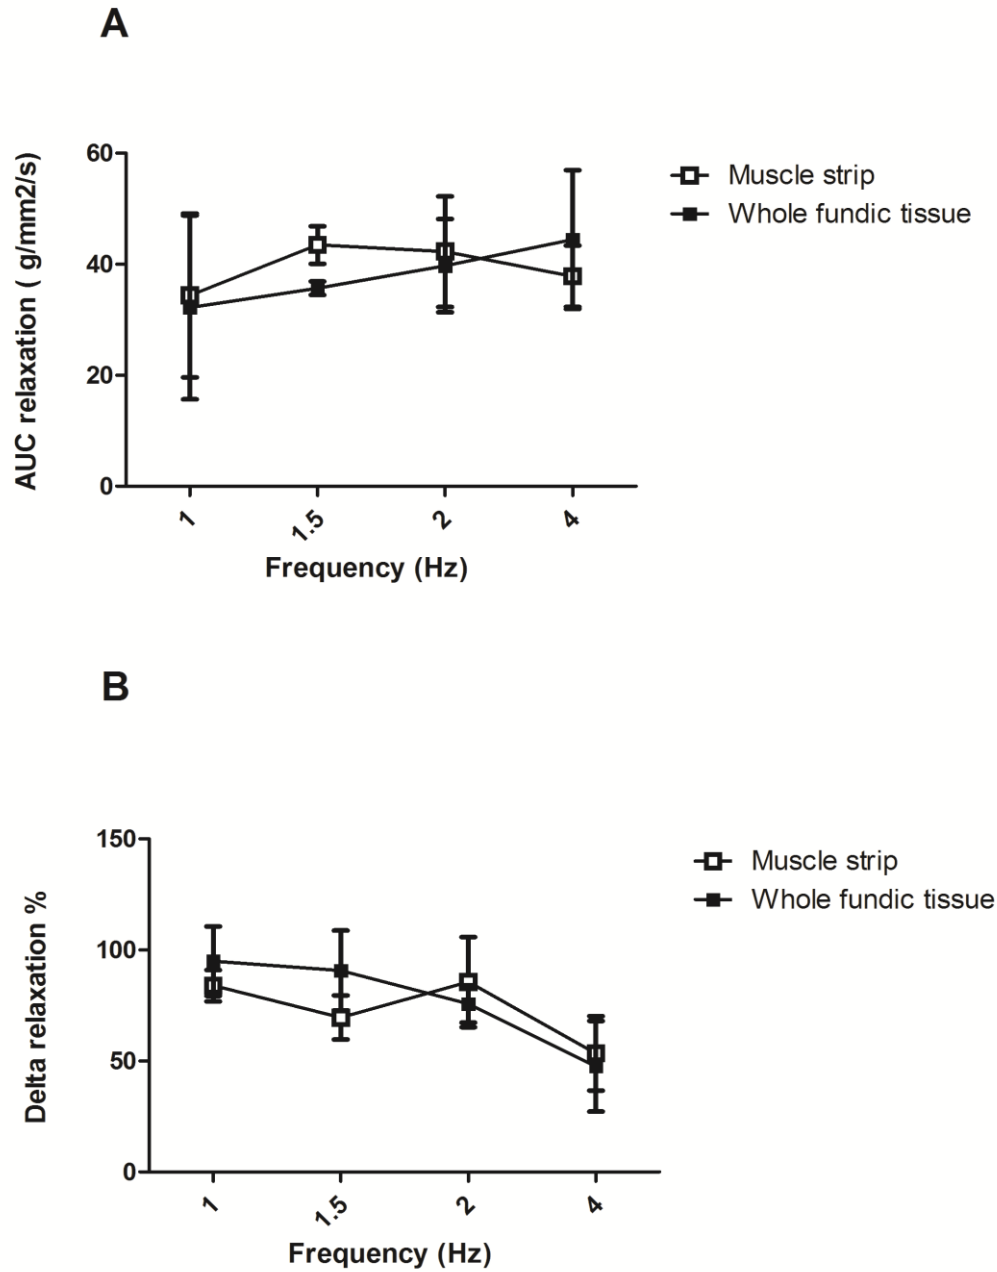

**Supplementary figure 1.**
